# Supplementary material for: Controlled synthesis and enhanced luminescence of europium-doped fluorine-substituted hydroxyapatite nanoparticles
Source: Royal Society of Chemistry journal article supplement (doi:10.1039/c3ce26973f), 2013-01-01
Supplement: c3ce26973f.pdf [file c3ce26973f.pdf]

## Supplementary Information

# Controlled synthesis and enhanced luminescence of europium-doped fluorine-substituted hydroxyapatite nanoparticles

Ruixue Sun\*, Kezheng Chen, Xiangfeng Wu, Dandan Zhao, Zhenzong Sun

College of Materials Science and Engineering, Qingdao University of Science and  
Technology, Qingdao 266042, China

\*To whom correspondence should be addressed. Email: [sunruixue@qust.edu.cn](mailto:sunruixue@qust.edu.cn)

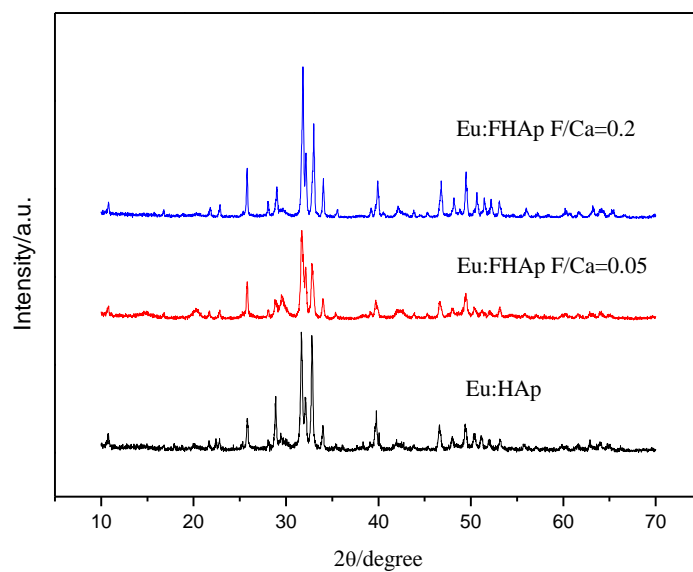

Fig.S1 XRD patterns of Eu:HAp nanoparticles with different F concentration prepared at pH 3.0

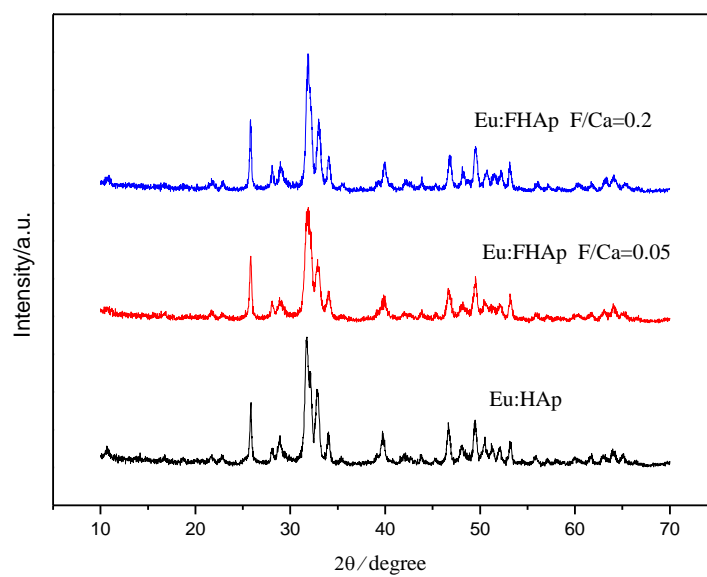

Fig.S2 XRD patterns of Eu:HAp nanoparticles with different F concentration prepared at pH 11.0

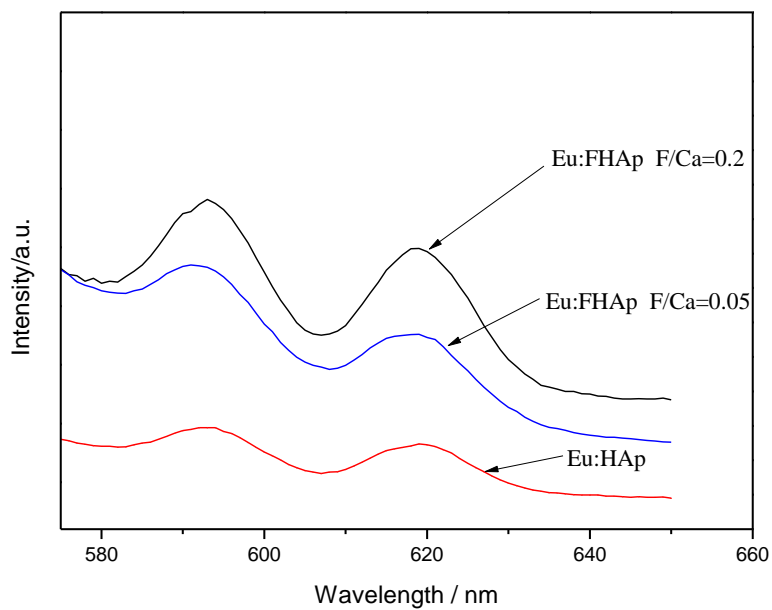

Fig.S3 Photoluminescence spectra of Eu:FHAp (prepared at pH 11.0) under 254 nm excitation.

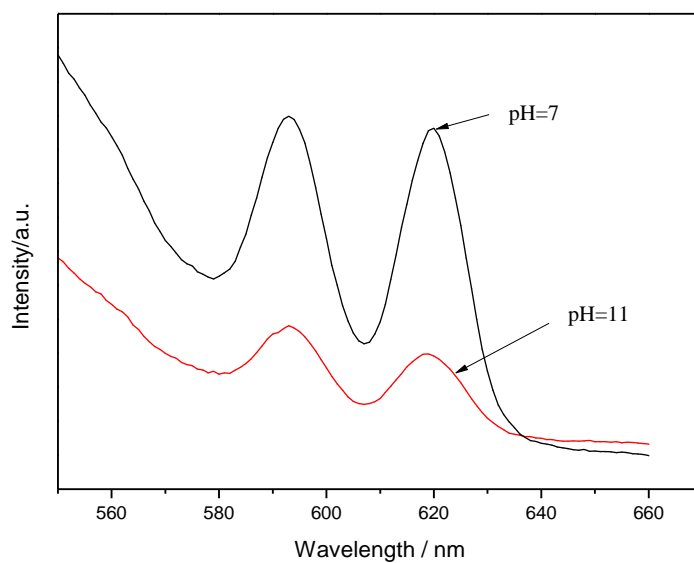

Fig.S4 Photoluminescence spectra of Eu:FHAp (F/Ca = 0.2) under 254 nm excitation.
